# Supplementary material
Source: Research Square preprint supplement (doi:10.21203/rs.3.rs-9174471/v1)
Supplement: Supplementary file 1 [file 213022f2924c986ee05c6e48.docx]

**Appendix File**

**Table S1. Plasmids Constructed in This Study.**

| Plasmids | Description | source |
| --- | --- | --- |
| pMD18-T | AmpR | Sangon  Biotech |
| pMD-slr0168 | AmpR, The upstream and downstream genes of slr0168 were cloned into the SphI/MluI and XbaI/KpnI sites of the pMD18-T vector. | This study |
| pMD-slr0168-Ω | SpR, The spectinomycin resistance gene was cloned into the XhoI/XbaI site of the pMD-slr0168 vector. | This study |
| pST407 | SpR, The PpsbA2s was cloned into the BamHI/SalI site of the pMD-slr0168-Ω vector, and the TrbcL was cloned into the SalI/HindIII site. | This study |
| pST407-TKS/OAC | SpR, The TKS/OAC gene was amplified, and the pST407 plasmid was double-digested with BglII/SacII. The fragments were then ligated and transformed into E. coli DH5α. | This study |
| pST02 | SpR, The AAE1 gene was amplified, and the pST407-TKS/OAC plasmid was digested with SacII. The fragments were then ligated and transformed into E. coli DH5α. | This study |
| pST408 | SpR, The Pcpc560 was cloned into the BamHI/SalI site of the pMD-slr0168-Ω vector, and the TrbcL was cloned into the SalI/HindIII site. | This study |
| pST408-TKS/OAC | SpR, The TKS/OAC gene was amplified, and the PJS408 plasmid was double-digested with BglII/SacII. The fragments were then ligated and transformed into E. coli DH5α. | This study |
| pST03 | SpR, The AAE1 gene was amplified, and the pST408-TKS/OAC plasmid was digested with SacII. The fragments were then ligated and transformed into E. coli DH5α. | This study |
| pMD-slr1176 | AmpR, The upstream and downstream genes of slr1176 were cloned into the SphI/MluI and XbaI/KpnI sites of the pMD18-T vector. | This study |
| pST04 | CmR, The chloramphenicol resistance gene was cloned into the XhoI/XbaI site of the pMD-slr1176 vector. | This study |
| pST503 | CmR, The Pcpc560 was cloned into the BamHI/SalI site of the pST04 vector, and the TrbcL was cloned into the SalI/HindIII site. | This study |
| pST05 | CmR, The maeB gene was amplified, and the pST503 plasmid was double-digested with BglII/PstI. The fragments were then ligated and transformed into E. coli DH5α. | This study |

**Table S2. Primers used in this study.**

| Primers | Sequence (5' to 3') |
| --- | --- |
| SP-F | CCACGCGTAAGCTTGGATCCGCTCACGCAACTGGTCCAGAA |
| SP-R | CGGGAGCTCGAATTCTAGAGTGCTTAGTGCATCTAACGC |
| TrbcL-F | CGCGTCGACCGGTGTTTGGATTGTCGGAGT |
| TrbcL-R | CCGACGCGTAAGCTTCCGGTAATTGGTAAATTGCTGTC |
| PpsbA2s-F | ATGGGGAAAAACTACAAAAGTTTAGATTCCGT |
| PpsbA2s-R | GTTGATTTTTGATTATACCCCCCGCAAATAA |
| TKS-F | AGTGAGTACCGGCCAAACCAT |
| TKS-R | ATGACCGCCAATGGTGCCTTC |
| AAE1-F | CTCCAACGGCTACTATCATGCC |
| AAE1-R | CATCCATCAACACGGTGCGCCA |
| slr0168Up-F | GGCATGCCGAGCGGCACCACGGGGCACCACCGC |
| slr0168Up-R | GACGCGTCGGCGCACAGCAGCGTGCGACGTGTG |
| slr0168Dw-F | CTCTAGAGTGCCACTACCTGGCGTGCCGCTACC |
| sIr0168Dw-R | GGGGTACCCCGCATGACCAGCTGCCGCCCCAGC |
| Pcpc-F | CGTCTAGAGGATCCCCTGTAGAGAAGAGTCCCTG |
| Pcpc-R | TTTCTCCTCTTTTGAATTAATCTCCTACTTGACTTTATGAG |
| TKS-qF | TCAACACGGTGCACCTCGAC |
| TKS-qR | GCGTCGCAGCCGGTGCGCCA |
| AAE1-qF | ATCAACACGGTGACGGTGCG |
| AAE1-qR | CGACGCGTAAGCCGTCCGGT |
| Cam-F | ACCGGCATGCGTTGATCGGCACGTAAGAGGT |
| Cam-R | CAACTGCAGTTACGCCCCGCCCTGCCACTCATC |
| slr1176Up-F | ACATGCATGCCAGTTAGCCTAGGCAGTGGTTC |
| slr1176Up-R | CGACGCGTCGACCGCCCCCTAAATCCCCCAATA |
| slr1176Dw-F | CTAGTCTAGAGTCGACCATTGCCGCAACGACACTG |
| slr1176Dw-R | CGAGCTCGGTACCACCAAAGAGTTATTGGCGGCTA |
| MaeB-F | AGGAGATTAATTCAAAAGAGGAGAAAATGGATGACCAGTTAAAACAAAGTGC |
| MaeB-R | ATCCAAACACCGGTCGACTGCAGTTACAGCGGTTGGGTTTGCGCT |


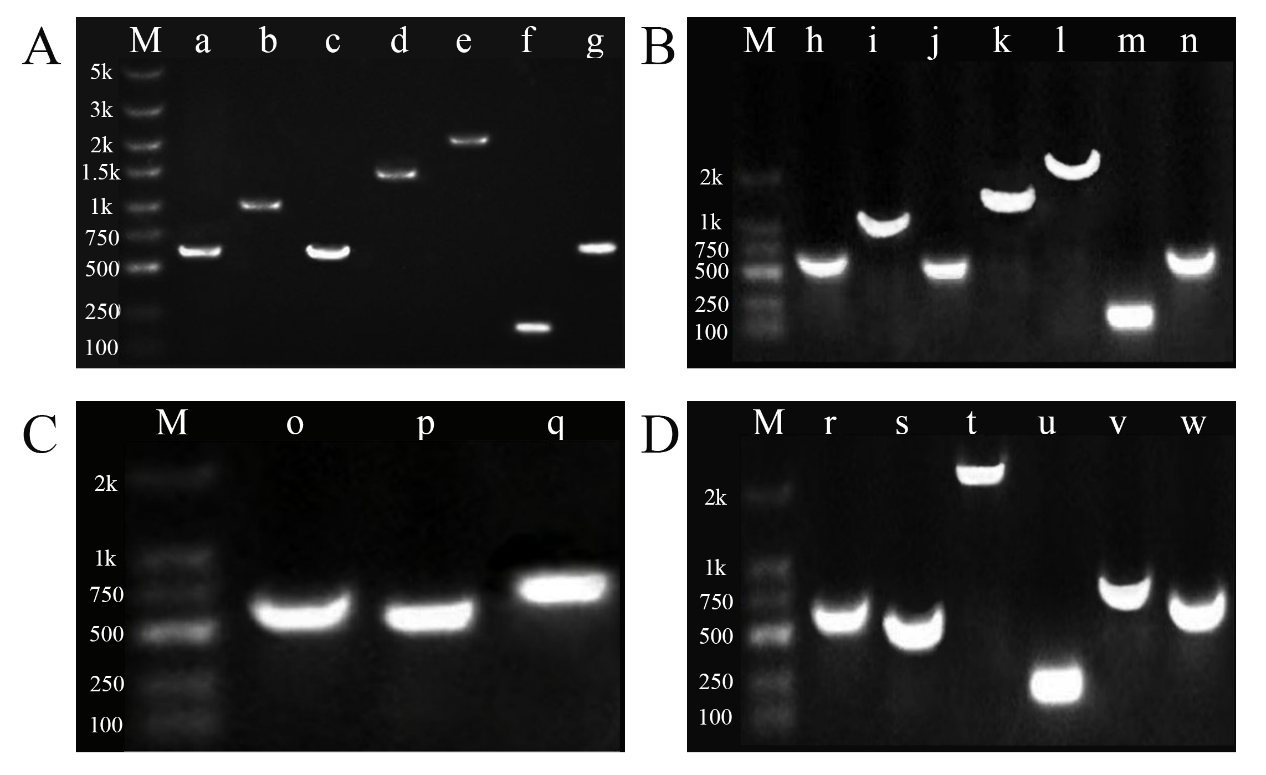


**Fig. S1. PCR identification of the plasmids for transformation. A)** Plasmid pST02, M: DNA Marker, a: Upstream homologous arm of slr0168 (600bp), b: Gentamicin resistance gene (1100bp), c: Promoter PpsbA2s (600bp), d: TKS/OAC gene (1500bp), e: AAE1 gene (2200bp), f: Terminator TrbcL (200bp), g: Downstream homologous arm of slr0168 (600bp); **B)** Plasmid pST03, M: DNA Marker, h: Upstream homologous arm of slr0168 (600bp), i: Gentamicin resistance gene (1100bp), j: Promoter Pcpc560 (500bp), k: TKS/OAC gene (1500bp), l: AAE1 gene (2200bp), m: Terminator TrbcL (200bp), n: Downstream homologous arm of slr0168 (600bp); **C)** Plasmid pST04, M: DNA Marker, o: Upstream homologous arm of slr1176 (600bp), p: Downstream homologous arm of slr1176 (600bp), q: Chloramphenicol resistance gene (750bp); **D)** Plasmid pST05, M: DNA Marker, r: Upstream homologous arm of slr1176 (600bp), s: Promoter Pcpc560 (500bp), t: maeB gene (2300bp), u: Terminator TrbcL (200bp), v: Chloramphenicol resistance gene (750bp), w: Downstream homologous arm of slr1176 (600bp).


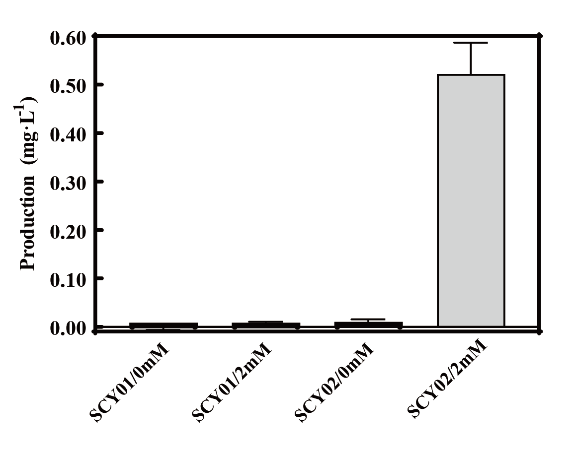


**Fig. S2. OLA production of SCY01/SCY02 on day 14 under 0-2 mM sodium hexanoate.**


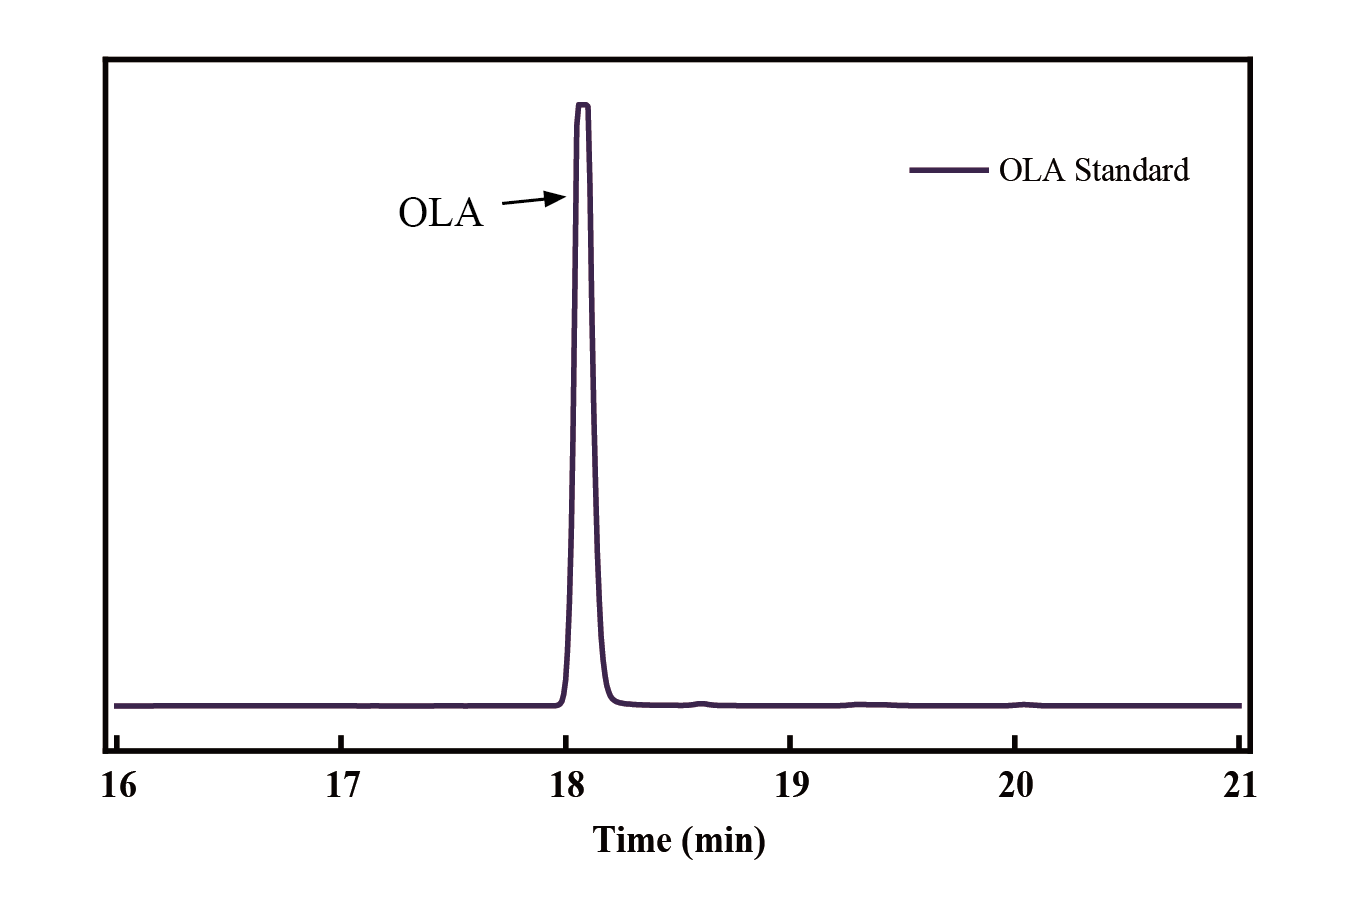


**Fig. S3. HPLC chromatogram of olivetolic acid standard.**
